# Supplementary material for: Prenatal anxiety and obstetric decisions among pregnant women in Wuhan and Chongqing during the COVID‐19 outbreak: a cross‐sectional study
Source: PubMed Central journal article supplement (PMC7362035; doi:10.1111/1471-0528.16381), 2020-08-02
Supplement: BJO-127-1229-s001.pdf [file BJO-127-1229-s001.pdf]

**Table S3.** Univariable analysis of background factors associated with anxiety

|                                        | Anxiety     |            |                   | $\chi^2$ | P-value |
|----------------------------------------|-------------|------------|-------------------|----------|---------|
|                                        | No          | Mild       | Moderate / Severe |          |         |
| <b>Employment status</b>               |             |            |                   | 5.1763   | 0.0229  |
| No                                     | 416(79.85)  | 78(14.97)  | 27(5.18)          |          |         |
| Yes                                    | 1197(83.94) | 192(13.46) | 37(2.59)          |          |         |
| <b>Gestational age, trimester</b>      |             |            |                   | 9.9127   | 0.0070  |
| First                                  | 73(87.95)   | 10(12.05)  | 0(0)              |          |         |
| Second                                 | 550(86.07)  | 71(11.11)  | 18(2.82)          |          |         |
| Third                                  | 990(80.82)  | 189(15.43) | 46(3.76)          |          |         |
| <b>Comorbidity and Complication</b>    |             |            |                   | 4.9146   | 0.0266  |
| No                                     | 1479(83.42) | 240(13.54) | 54(3.05)          |          |         |
| Yes                                    | 134(77.01)  | 30(17.24)  | 10(5.75)          |          |         |
| <b>Information sources of COVID-19</b> |             |            |                   | 7.5997   | 0.0224  |
| Official media                         | 1375(83.79) | 217(13.22) | 49(2.99)          |          |         |
| Unofficial media                       | 221(78.37)  | 47(16.67)  | 14(4.96)          |          |         |
| Other                                  | 17(70.83)   | 6(25.00)   | 1(4.17)           |          |         |
| <b>Exposure history to COVID-19</b>    |             |            |                   | 9.2994   | 0.0023  |
| No                                     | 1583(83.23) | 260(13.67) | 59(3.10)          |          |         |
| Yes                                    | 30(66.67)   | 10(22.22)  | 5(11.11)          |          |         |

(With statistical difference, but not including those identified by multivariable analysis)

Data are n (%). Kruskal-Wallis test was used.
