# Supplementary material for: Prenatal anxiety and obstetric decisions among pregnant women in Wuhan and Chongqing during the COVID‐19 outbreak: a cross‐sectional study
Source: PubMed Central journal article supplement (PMC7362035; doi:10.1111/1471-0528.16381), 2020-08-02
Supplement: BJO-127-1229-s002.pdf [file BJO-127-1229-s002.pdf]

**Table S2.** Comorbidity and complication of participants

|                                          | City            |                     | Total<br>(n=174) |
|------------------------------------------|-----------------|---------------------|------------------|
|                                          | Wuhan<br>(n=89) | Chongqing<br>(n=85) |                  |
| Threatened miscarriage or preterm labour | 16(17.98)       | 13(15.29)           | 29(16.67)        |
| Foetal complication                      | 12(13.48)       | 6(7.06)             | 18(10.34)        |
| Placenta abnormality                     | 5(5.62)         | 8(9.41)             | 13(7.47)         |
| Hypertensive disorder                    | 13(14.61)       | 8(9.41)             | 21(12.07)        |
| Gestational diabetes mellitus            | 63(70.79)       | 46(54.12)           | 109(62.64)       |
| Intrahepatic cholestasis                 | 1(1.12)         | 4(4.71)             | 5(2.87)          |
| Thyroid diseases (hypothyroidism)        | 6(6.74)         | 8(9.41)             | 14(8.05)         |
| Other system diseases                    | 3(3.37)         | 4(4.71)             | 7(4.02)          |

Data are n (%).

This is a multiple-choice question. We made reclassifications based on the answers we obtained.
