# Supplementary material for: Prenatal anxiety and obstetric decisions among pregnant women in Wuhan and Chongqing during the COVID‐19 outbreak: a cross‐sectional study
Source: PubMed Central journal article supplement (PMC7362035; doi:10.1111/1471-0528.16381), 2020-08-02
Supplement: BJO-127-1229-s003.pdf [file BJO-127-1229-s003.pdf]

**Table S5.** Current obstetric situations in two hospitals

|          | Wuhan <sup>A</sup> |           |         | Chongqing <sup>B</sup> |           |         |
|----------|--------------------|-----------|---------|------------------------|-----------|---------|
|          | Feb, 2019          | Feb, 2020 | Change  | Feb, 2019              | Feb, 2020 | change  |
| ANC      | 27,254             | 5,410     | ↓80.15% | 16,120                 | 6,859     | ↓57.45% |
| Births   | 2,038              | 2,090     | ↑2.55%  | 662                    | 497       | ↓24.92% |
| CS rates | 46.96%             | 47.42%    | ↑0.46%  | 55.33%                 | 60.51%    | ↑5.18%  |

A, Data from Maternal and Child Health Hospital of Hubei Province.

B, Data from the First Affiliated Hospital of Chongqing Medical University.

ANC, antenatal care or prenatal care. CS, caesarean section.
