# Supplementary material for: Prenatal anxiety and obstetric decisions among pregnant women in Wuhan and Chongqing during the COVID‐19 outbreak: a cross‐sectional study
Source: PubMed Central journal article supplement (PMC7362035; doi:10.1111/1471-0528.16381), 2020-08-02
Supplement: BJO-127-1229-s018.pdf [file BJO-127-1229-s018.pdf]

**Table S1.** Participants' background of demographic, pregnancy and COVID-19 epidemic

|                                                  | City             |                       | Total<br>(n=1947) | $\chi^2$ | <i>P</i> -value |
|--------------------------------------------------|------------------|-----------------------|-------------------|----------|-----------------|
|                                                  | Wuhan<br>(n=932) | Chongqing<br>(n=1015) |                   |          |                 |
| <b>Maternal age, years</b>                       |                  |                       | /                 | 3.5481   | 0.0596          |
| <35                                              | 843(90.45)       | 891(87.78)            | 1734(89.06)       |          |                 |
| $\geq 35$                                        | 89(9.55)         | 124(12.22)            | 213(10.94)        |          |                 |
| <b>Highest educational background</b>            |                  |                       | /                 | 1.3353   | 0.5129          |
| Junior middle school and below                   | 31(3.33)         | 26(2.56)              | 57(2.93)          |          |                 |
| Senior middle school                             | 106(11.37)       | 125(12.32)            | 231(11.86)        |          |                 |
| University and above                             | 795(85.30)       | 864(85.12)            | 1659(85.21)       |          |                 |
| <b>Employment status</b>                         |                  |                       | /                 | 29.0612  | <0.0001         |
| No                                               | 302(32.40)       | 219(21.58)            | 521(26.76)        |          |                 |
| Yes                                              | 630(67.60)       | 796(78.42)            | 1426(73.24)       |          |                 |
| <b>Monthly household income, CNY</b>             |                  |                       | /                 | 7.9822   | 0.0464          |
| < 5,000                                          | 100(10.73)       | 108(10.64)            | 208(10.68)        |          |                 |
| 5,000-9,999                                      | 389(41.74)       | 440(43.35)            | 829(42.58)        |          |                 |
| 10,000-49,999                                    | 407(43.67)       | 449(44.24)            | 856(43.97)        |          |                 |
| 50,000 or more                                   | 36(3.86)         | 18(1.77)              | 54(2.77)          |          |                 |
| <b>Gestational age, trimester</b>                |                  |                       | /                 | 241.8110 | <0.0001         |
| First                                            | 42(4.51)         | 41(4.04)              | 83(4.26)          |          |                 |
| Second                                           | 146(15.67)       | 493(48.57)            | 639(32.82)        |          |                 |
| Third                                            | 744(79.83)       | 481(47.39)            | 1225(62.92)       |          |                 |
| <b>Ways of conception</b>                        |                  |                       | /                 | 1.5030   | 0.2202          |
| Spontaneous pregnancy                            | 857(91.95)       | 948(93.40)            | 1805(92.71)       |          |                 |
| Assisted reproductive technology                 | 75(8.05)         | 67(6.60)              | 142(7.29)         |          |                 |
| <b>Parity</b>                                    |                  |                       | /                 | 0.5229   | 0.4696          |
| Nullipara                                        | 674(72.32)       | 719(70.84)            | 1393(71.55)       |          |                 |
| Multipara                                        | 258(27.68)       | 296(29.16)            | 554(28.45)        |          |                 |
| <b>Foetal number</b>                             |                  |                       | /                 | 12.9739  | 0.0003          |
| One (singleton)                                  | 917(98.39)       | 970(95.57)            | 1887(96.92)       |          |                 |
| Two or more (multiple)                           | 15(1.61)         | 45(4.43)              | 60(3.08)          |          |                 |
| <b>Comorbidity and Complication <sup>A</sup></b> |                  |                       | /                 | 0.8242   | 0.3639          |
| No                                               | 843(90.45)       | 930(91.63)            | 1773(91.06)       |          |                 |
| Yes                                              | 89(9.55)         | 85(8.37)              | 174(8.94)         |          |                 |
| <b>Information sources of COVID-19</b>           |                  |                       | /                 | 3.7567   | 0.1528          |
| Official media                                   | 771(82.73)       | 870(85.71)            | 1641(84.28)       |          |                 |
| Unofficial media                                 | 150(16.09)       | 132(13.00)            | 282(14.48)        |          |                 |
| Other                                            | 11(1.18)         | 13(1.28)              | 24(1.24)          |          |                 |
| <b>Exposure history to COVID-19</b>              |                  |                       | /                 | 45.9812  | <0.0001         |
| No                                               | 888(95.28)       | 1014(99.90)           | 1902(97.69)       |          |                 |
| Yes                                              | 44(4.72)         | 1(0.10)               | 45(2.31)          |          |                 |
| <b>Infected symptoms of COVID-19</b>             |                  |                       | /                 | 1.7974   | 0.1800          |
| No                                               | 920(98.71)       | 1008(99.31)           | 1928(99.02)       |          |                 |
| Yes                                              | 12(1.29)         | 7(0.69)               | 19(0.98)          |          |                 |

Data are n (%). Comparisons were conducted across the two cities. Chi-squared test was used.

CNY, Chinese yuan. A, Comorbidity and Complication (see **Table S2**).
