# Supplementary material for: Prenatal anxiety and obstetric decisions among pregnant women in Wuhan and Chongqing during the COVID‐19 outbreak: a cross‐sectional study
Source: PubMed Central journal article supplement (PMC7362035; doi:10.1111/1471-0528.16381), 2020-08-02
Supplement: BJO-127-1229-s019.pdf [file BJO-127-1229-s019.pdf]

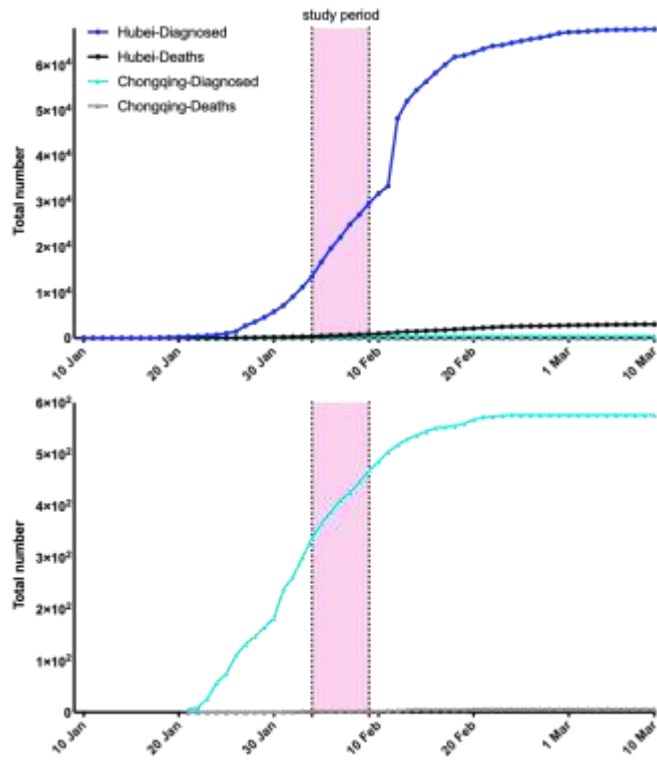

**Figure S2.** The stage of the epidemic in each of the two cities.

Authoritative data concerning the epidemic situation above come from National Health Commission of the People's Republic of China (<http://www.nhc.gov.cn/>, accessed 23 Apr, 2020) and Health Commission of Chongqing (<http://wsjkw.cq.gov.cn/>, accessed 23 Apr, 2020).
