# Supplementary material for: Prenatal anxiety and obstetric decisions among pregnant women in Wuhan and Chongqing during the COVID‐19 outbreak: a cross‐sectional study
Source: PubMed Central journal article supplement (PMC7362035; doi:10.1111/1471-0528.16381), 2020-08-02
Supplement: BJO-127-1229-s021.pdf [file BJO-127-1229-s021.pdf]

**Table S4.** Participants' obstetric decisions (on the third trimester only)

|                                                              | City       |            | Total       | $\chi^2$ | P-value |
|--------------------------------------------------------------|------------|------------|-------------|----------|---------|
|                                                              | Wuhan      | Chongqing  |             |          |         |
| <b>Request of online consultation</b> <sup>A</sup>           | (n=744)    | (n=481)    | (n=1225)    | 0.1209   | 0.7281  |
| Yes                                                          | 571(76.75) | 365(75.88) | 936(76.41)  |          |         |
| No                                                           | 173(23.25) | 116(24.12) | 289(23.59)  |          |         |
| <b>Hospital preference</b> <sup>B</sup>                      | (n=744)    | (n=481)    | (n=1225)    | /        | /       |
| Refuse to go to any hospital                                 | 299(40.19) | 102(21.21) | 401(32.73)  | 47.8060  | <0.0001 |
| Previous hospital of prenatal care                           | 258(34.68) | 369(76.72) | 627(51.18)  | 206.6162 | <0.0001 |
| Hospital closer to home                                      | 114(15.32) | 59(12.27)  | 173(14.12)  | 2.2503   | 0.1336  |
| Large comprehensive hospital                                 | 26(3.49)   | 40(8.32)   | 66(5.39)    | 13.3220  | 0.0003  |
| Specialized hospital of Obstetrics                           | 348(46.77) | 66(13.72)  | 414(33.80)  | 142.6425 | <0.001  |
| <b>Prenatal care (plan, reason/way)</b> <sup>B</sup>         | (n=391)    | (n=356)    | (n=747)     | /        | /       |
| Postponed, inconvenience                                     | 365(93.35) | 279(78.37) | 644(86.21)  | 35.1742  | <0.001  |
| Postponed, afraid of infected                                | 156(39.90) | 107(30.06) | 263(35.21)  | 7.9117   | 0.0049  |
| As planned (on time), online                                 | 3(0.77)    | 13(3.65)   | 16(2.14)    | 7.3965   | 0.0065  |
| As planned (on time), face-to-face                           | 7(1.79)    | 53(14.89)  | 60(8.03)    | 43.2720  | <0.001  |
| <b>Hospitalized delivery (plan, reason/way)</b> <sup>B</sup> | (n=201)    | (n=86)     | (n=287)     | /        | /       |
| Postponed, inconvenience                                     | 95(47.26)  | 27(31.40)  | 122(42.51)  | 6.2058   | 0.0127  |
| Postponed, afraid of infected (self)                         | 102(50.75) | 36(41.86)  | 138(48.08)  | 1.9050   | 0.1675  |
| Postponed, afraid of infected (baby)                         | 104(51.74) | 37(43.02)  | 141(49.13)  | 1.8316   | 0.1759  |
| Ahead of time, waiting for labour                            | 35(17.41)  | 9(10.47)   | 44(15.33)   | 2.2398   | 0.1345  |
| Ahead of time, caesarean in advance                          | 31(15.42)  | 6(6.98)    | 37(12.89)   | 3.8261   | 0.0505  |
| As planned (on time)                                         | 38(18.91)  | 34(39.53)  | 72(25.09)   | 13.6389  | 0.0002  |
| <b>Delivery mode</b> <sup>A</sup>                            | (n=744)    | (n=481)    | (n=1225)    | 10.8341  | 0.0127  |
| Always CS                                                    | 146(19.62) | 113(23.49) | 259(21.14)  |          |         |
| Always VD                                                    | 457(61.42) | 309(64.24) | 766(62.53)  |          |         |
| Change from CS to VD                                         | 41(5.51)   | 20(4.16)   | 61(4.98)    |          |         |
| Change from VD to CS                                         | 100(13.44) | 39(8.11)   | 139(11.35)  |          |         |
| <b>Infant feeding</b> <sup>A</sup>                           | (n=744)    | (n=481)    | (n=1225)    | 15.0342  | 0.0018  |
| Always breast feeding                                        | 627(84.27) | 437(90.85) | 1064(86.86) |          |         |
| Always bottle feeding                                        | 17(2.28)   | 13(2.70)   | 30(2.45)    |          |         |
| Change from breast to bottle                                 | 74(9.95)   | 23(4.78)   | 97(7.92)    |          |         |
| Change from bottle to breast                                 | 26(3.49)   | 8(1.66)    | 34(2.76)    |          |         |
| <b>Postnatal resting place</b> <sup>A</sup>                  | (n=744)    | (n=481)    | (n=1225)    | 31.0503  | <0.0001 |
| Always home                                                  | 553(74.33) | 400(83.16) | 953(77.80)  |          |         |
| Always PSI                                                   | 42(5.56)   | 40(8.32)   | 82(6.69)    |          |         |
| Change from home to PSI                                      | 12(1.61)   | 4(0.83)    | 16(1.31)    |          |         |
| Change from PSI to home                                      | 137(18.41) | 37(7.69)   | 174(14.20)  |          |         |
| <b>Impact of changing schedule</b> <sup>C</sup>              | (n=744)    | (n=481)    | (n=1225)    | 109.7851 | <0.0001 |
| Completely no impact                                         | 8(1.08)    | 5(1.04)    | 13(1.06)    |          |         |
| Almost no impact                                             | 17(2.28)   | 27(5.61)   | 44(3.59)    |          |         |
| Slight impact                                                | 100(13.44) | 142(29.52) | 242(19.76)  |          |         |
| Comparative impact                                           | 295(39.65) | 227(47.19) | 522(42.61)  |          |         |
| Significant impact                                           | 324(43.55) | 80(16.63)  | 404(32.98)  |          |         |
| <b>Impact of reduced activities</b> <sup>C</sup>             | (n=744)    | (n=481)    | (n=1225)    | 47.7869  | <0.0001 |
| Completely no impact                                         | 10(1.34)   | 9(1.87)    | 19(1.55)    |          |         |
| Almost no impact                                             | 36(4.84)   | 42(8.73)   | 78(6.37)    |          |         |
| Slight impact                                                | 136(18.28) | 123(25.57) | 259(21.14)  |          |         |
| Comparative impact                                           | 305(40.99) | 230(47.82) | 535(43.67)  |          |         |
| Significant impact                                           | 257(34.54) | 77(16.01)  | 334(27.27)  |          |         |
| <b>Impact of chest CT scan</b> <sup>C</sup>                  | (n=744)    | (n=481)    | (n=1225)    | 2.3083   | 0.1287  |
| Completely no impact                                         | 7(0.94)    | 1(0.21)    | 8(0.65)     |          |         |
| Almost no impact                                             | 17(2.28)   | 6(1.25)    | 23(1.88)    |          |         |
| Slight impact                                                | 101(13.58) | 48(9.98)   | 149(12.16)  |          |         |
| Comparative impact                                           | 262(35.22) | 185(38.46) | 447(36.49)  |          |         |
| Significant impact                                           | 357(47.98) | 241(50.10) | 598(48.82)  |          |         |

Data are n (%). Comparisons were conducted across the two cities.

A, Chi-squared test was used.

B, multiple choice, Chi-squared test was used for each choice.

C, Kruskal-Wallis test was used.

CS, caesarean section delivery. VD, vaginal delivery. PSI, postnatal resting institution.
